# Supplementary material for: The mediodorsal pulvinar coordinates the macaque fronto-parietal network during rhythmic spatial attention
Source: PubMed Central journal article supplement (PMC6333835; doi:10.1038/s41467-018-08151-4), 2019-01-15
Supplement: 41467_2018_8151_MOESM1_ESM.pdf [file 41467_2018_8151_MOESM1_ESM.pdf]

## Supplementary Materials

The mediodorsal pulvinar coordinates the macaque fronto-parietal network during rhythmic spatial attention

Fiebelkorn et al.

## SUPPLEMENTAL MATERIALS

| ROI   | all | visual | visual-<br>movement | movement |
|-------|-----|--------|---------------------|----------|
| mdPul | 224 | 20     | 19                  | 13       |
| FEF   | 238 | 36     | 45                  | 17       |
| LIP   | 259 | 39     | 41                  | 18       |

**Supplementary Table 1.** *Numbers of neurons in each ROI with significantly increased task-related responses.* Neurons were classified as visual (i.e., only visual-sensory activity), visual-movement (i.e., both visual-sensory and saccade-related activity), and movement (i.e., only saccade-related activity) types.

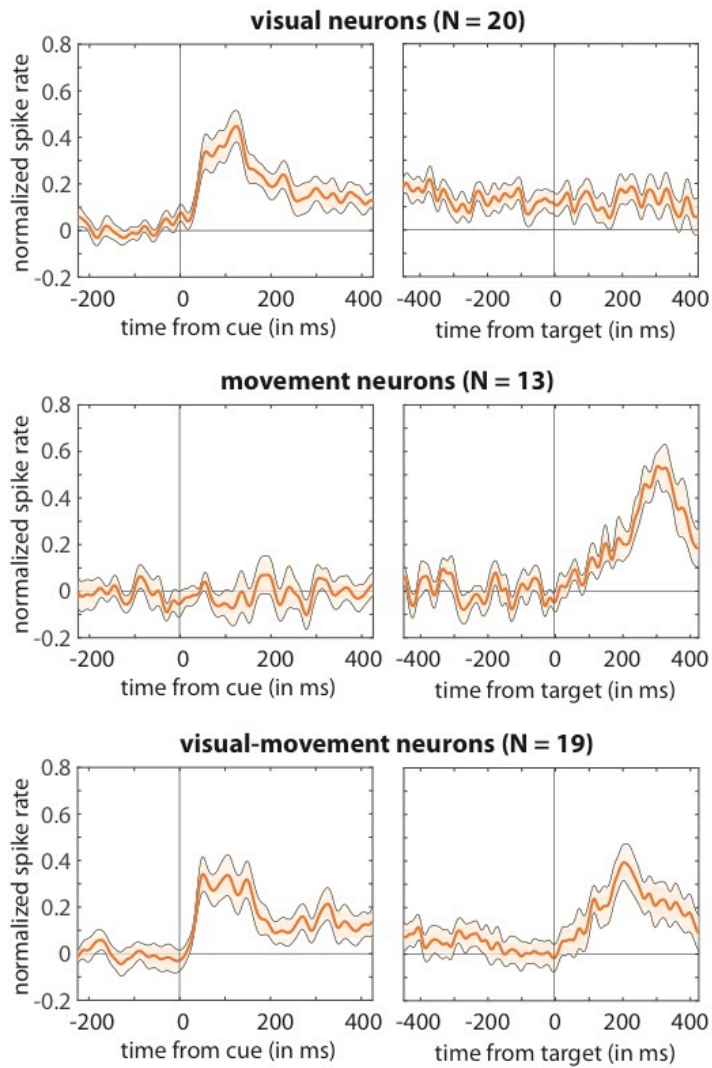

**Supplementary Figure 1.** Normalized population spike rates in mdPul by cell type. Significant spiking during the cue-target delay was observed in visual and visual-movement neurons, but not in movement neurons.

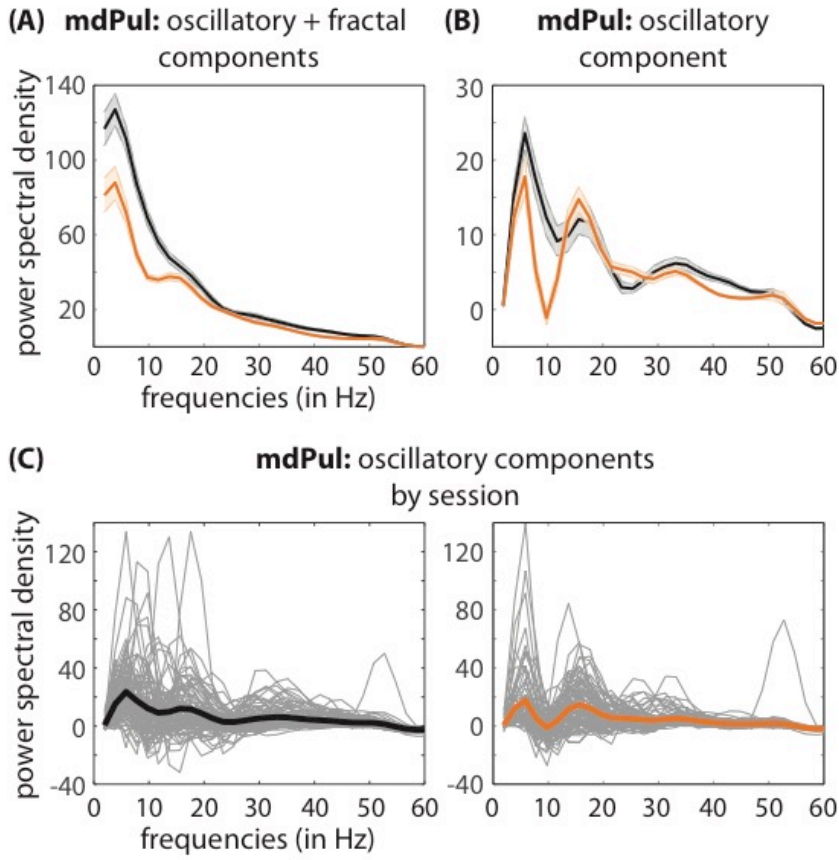

**Supplementary Figure 2.** Power spectral density in mdPul when response fields overlapped the cued location, prior to the cue (black line) and during the cue-target delay (orange line). **(A)** There was a general drop in low-frequency power following the cue, but **(B)** removing the fractal (or 1/f) component, using the IRASA approach (Wen & Liu, 2016), demonstrates an apparent oscillatory peak in the theta range during both trial periods, as well as a peak in the alpha/low-beta range. **(C)** The oscillatory components for each recording session, prior to the cue (on left) and during the cue-target delay (on right), relative to the average across sessions (bolded lines).

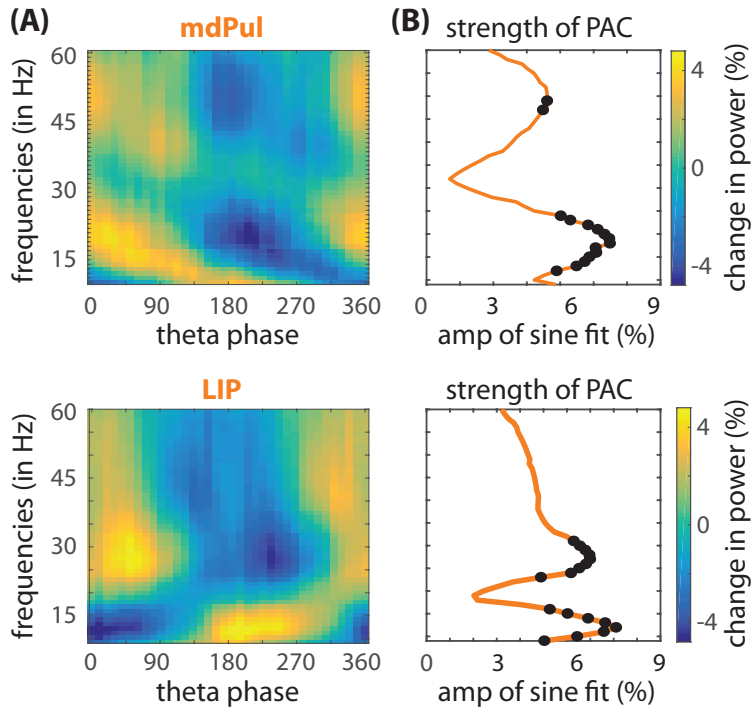

**Supplementary Figure 3.** Phase-amplitude coupling (PAC) between theta phase and oscillatory power (from 9–60 Hz) in MdPul and LIP during spatial attention. **(A)** For mdPul, higher alpha/low-beta power occurred during the theta phase associated with relatively better visual-target detection (i.e., the “good” theta phase). For LIP, higher alpha/low-beta power occurred during the theta phase associated with relatively worse visual-target detection (i.e., the “poor” theta phase)<sup>4</sup>. **(B)** Oscillatory power as a function of theta phase was fit with one-cycle sine waves, with the amplitude of those fitted sine waves measuring the strength of PAC (see Fig. 2A for a depiction of a similar approach). The black dots represent statistically significant PAC after corrections for multiple comparisons.

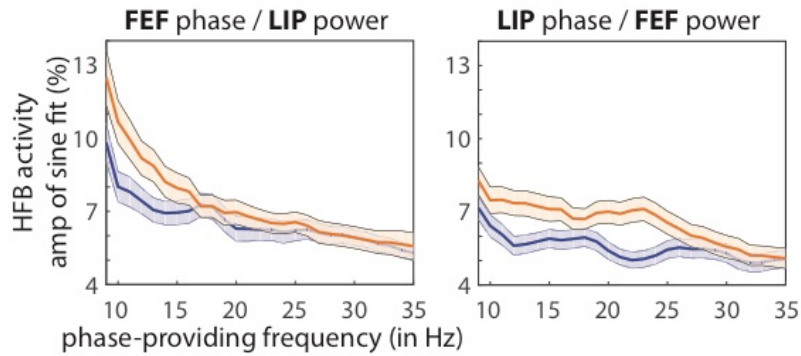

**Supplementary Figure 4.** *Phase-amplitude coupling (PAC) between alpha/low-beta phase in FEF (or LIP) and high-frequency band (HFB) power in LIP (or FEF) increases during spatial attention.* HFB power, a proxy for population spiking, was binned by oscillatory phase (at frequencies from 9–35 Hz). PAC was measured by fitting one-cycle sine waves to the resulting HFB by phase functions (see Fig. 2A for depiction of a similar approach)<sup>4</sup>. The amplitudes of the fitted sine waves was used to estimate the strength of PAC at each phase-providing frequency. The above plots compare PAC when receptive/response fields overlapped either the cued (orange) or the non-cued (blue) location. These results demonstrate that alpha/low-beta activity is functionally relevant in FEF and LIP, organizing between-region interactions under conditions of spatial attention. Shaded regions around the lines represent SEs.

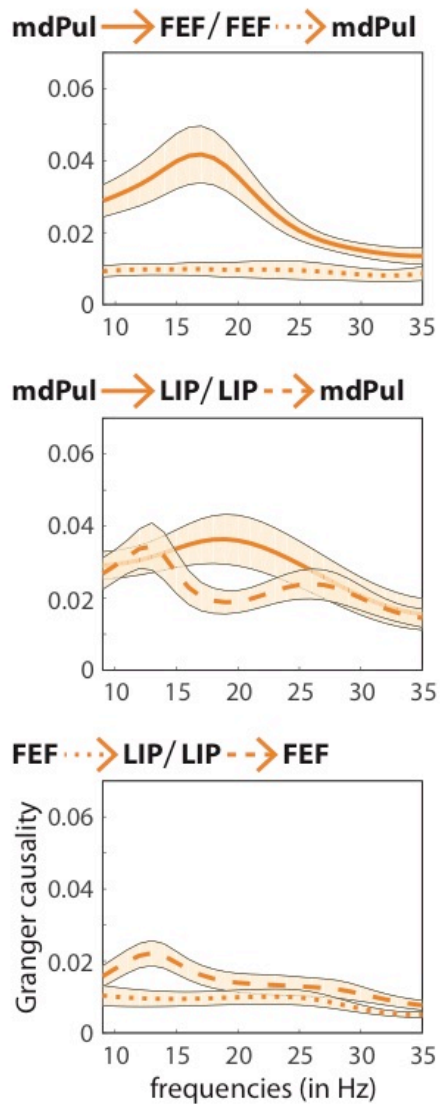

**Supplementary Figure 5.** Conditional Granger causality for a subset of recording sessions ( $N = 31$ ) when all 3 ROIs had overlapping response fields. These results are similar to those reported in Figure 5.

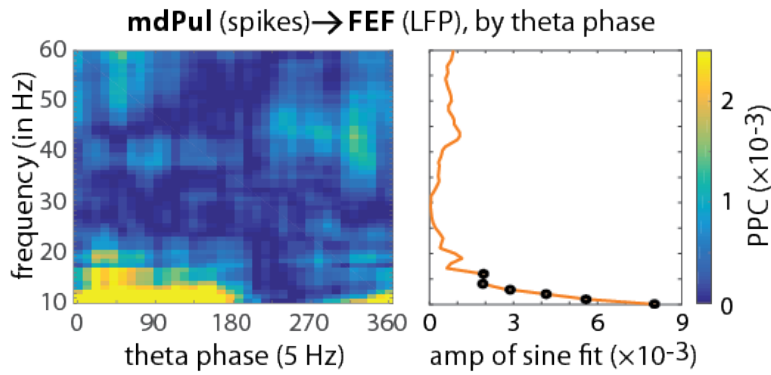

**Supplementary Figure 6.** Spikes in *mdPul* also seem to be specifically coupled to alpha/low-beta activity in FEF during the “good” theta phase. Spike-LFP phase coupling (from 9–60 Hz) was calculated in overlapping theta-phase bins (on left), using step sizes of 10 degrees. The resulting functions were then fit with one-cycle sine waves. The amplitude of these sine waves provided a measure of how strongly spike-LFP phase coupling was modulated by the phase of theta rhythms (on right, see Fig. 2A for depiction of a similar approach). The black dots represent statistically significant results after corrections for multiple comparisons. See Fig. 4B for additional evidence.



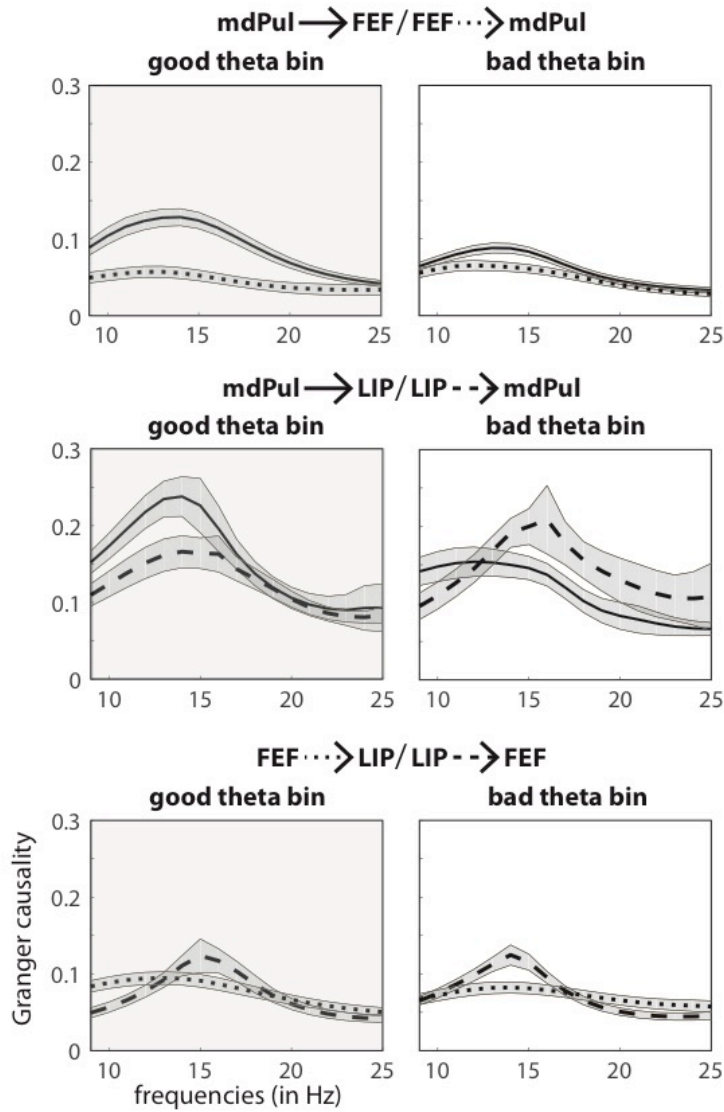

**Supplementary Figure 7.** Granger causal influence indicates that mdPul regulates alpha/low-beta activity in cortical hubs of the attention network (i.e., FEF and LIP). Shows Granger causal influence after binning based on theta phase (“good” vs. “poor”). Here, we first used a stratification procedure to equate alpha/low-beta power, both across ROIs and across theta-phase bins. These findings confirm the results presented in Figure 4, demonstrating that mdPul specifically regulates cortical activity during periods of relatively better visual-target detection (i.e., during the “good” theta phase). Shaded regions around the lines represent SEs.

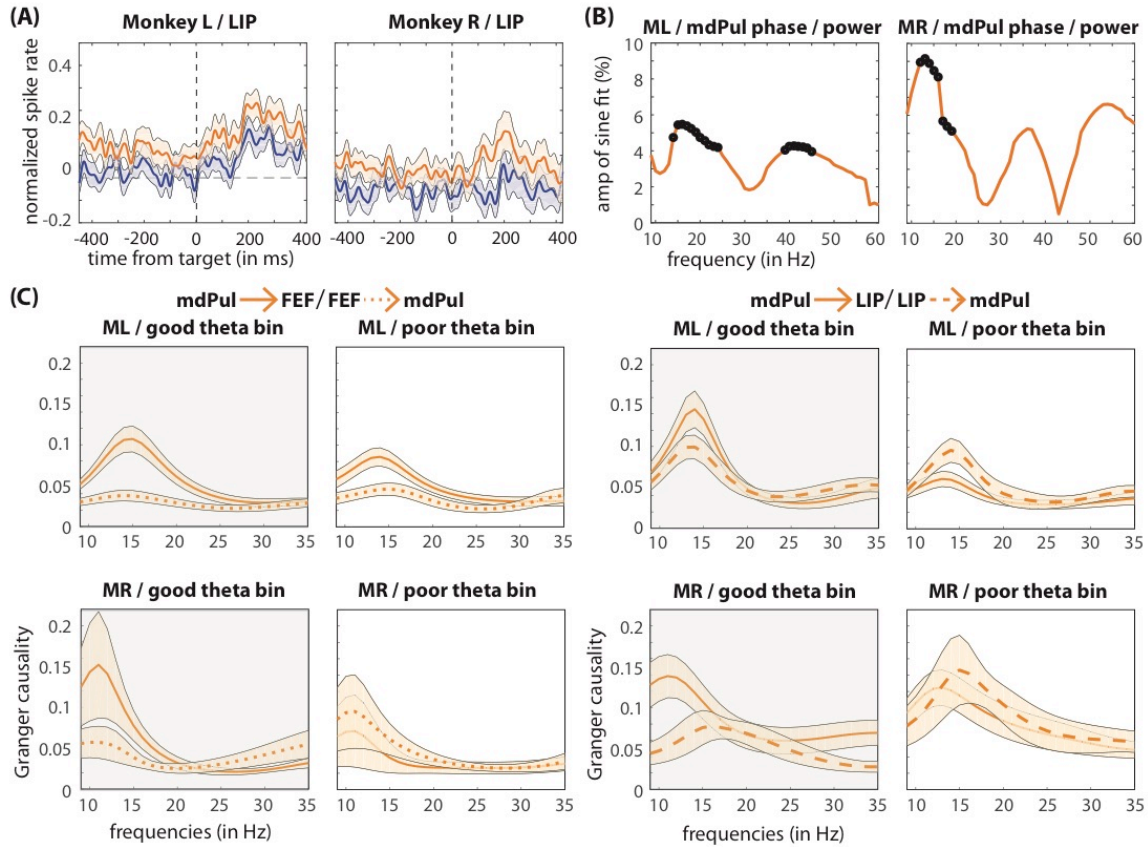

**Supplementary Figure 8.** Both monkeys (*L* and *R*) contributed to effects that we observed after combining data across the two animals. For example, **(A)** shows greater delay spiking when receptive fields overlapped the cued location (in orange), relative to when receptive fields overlapped the non-cued location (in blue), **(B)** shows significant coupling between theta phase (at 5Hz) and alpha/low-beta power, and **(C)** shows theta-dependent changes in functional connectivity, with greater Granger causal influence from mdPul to higher-order cortex (i.e., FEF and LIP) during the “good” theta phase (i.e., during periods of enhanced perceptual sensitivity). The black dots in **(B)** represent statistical significance after corrections for multiple comparisons.
